# Supplementary material for: A novel ratiometric AIEE/ESIPT probe for palladium species detection with ultra-sensitivity
Source: Royal Society of Chemistry journal article supplement (doi:10.1039/c9ra06046d), 2019-01-01
Supplement: c9ra06046d1.pdf [file c9ra06046d1.pdf]

## Supporting information

# A Novel Ratiometric AIEE/ESIPT Probe for Palladium Species Detection with ultra-sensitivity

Zixuan Xu<sup>a</sup>, Mingshu Zhang<sup>a</sup>, Rui Zhang<sup>a</sup>, Shudi Liu<sup>b</sup>, Ying Yang<sup>\*a</sup>

<sup>a</sup>Laboratory of Nonferrous Metals Chemistry and Resources Utilization of Gansu Province, College of Chemistry and Chemical Engineering, Lanzhou University, Lanzhou 730000, Gansu, P. R. China.

<sup>b</sup> College of Chemistry and Chemical Engineering, Yantai University, Yantai, 264005, P. R. China.

E-mail: [yangying@lzu.edu.cn](mailto:yangying@lzu.edu.cn)

## Contents

1. Materials and Methods.
2. The characterization data of HPNI-1
3. Additional Spectra

### 1. Materials and Methods

| Entry    | Reagent                            | Quantity | Solvent (50mL) | Conc.  |
|----------|------------------------------------|----------|----------------|--------|
| <b>A</b> | HPNI                               | 21.9 mg  | THF            | 1 mM   |
| <b>B</b> | HPNI-1                             | 26.1 mg  | THF            | 1 mM   |
| <b>C</b> | Pd(PPh <sub>3</sub> ) <sub>4</sub> | 5.8 mg   | DMSO           | 0.1 mM |

|          |                                         |        |                  |        |
|----------|-----------------------------------------|--------|------------------|--------|
| <b>D</b> | $\text{Pd}(\text{PPh}_3)_2\text{Cl}_2$  | 5.3 mg | DMSO             | 0.1 mM |
| <b>E</b> | $\text{Pd}_2(\text{dba})_3$             | 4.6 mg | DMSO             | 0.1 mM |
| <b>F</b> | $(\text{C}_3\text{H}_5)_2\text{PdCl}_2$ | 1.8 mg | DMSO             | 0.1 mM |
| <b>G</b> | $\text{K}_2\text{PdCl}_6$               | 2.0 mg | H <sub>2</sub> O | 0.1 mM |

Notes: All reagents and solvents were obtained commercially and used without further purification unless otherwise noted.  $^1\text{H}$  NMR and  $^{13}\text{C}$  NMR spectra were recorded on a JEOLBCS 400M spectrometer. Mass spectra (ESI) were recorded on a LQC system (Finngan MAT, USA). All UV—visible spectra was recorded by a Varian Cary 100 spectrophotometer. Fluorescence spectra were recorded using an Edinburgh FLSP920. Fluorescence spectra were measured after addition of palladium for 1min.

### 3. The characterization data of HPNI-1

#### $^1\text{H}$ NMR spectra of HPNI-1

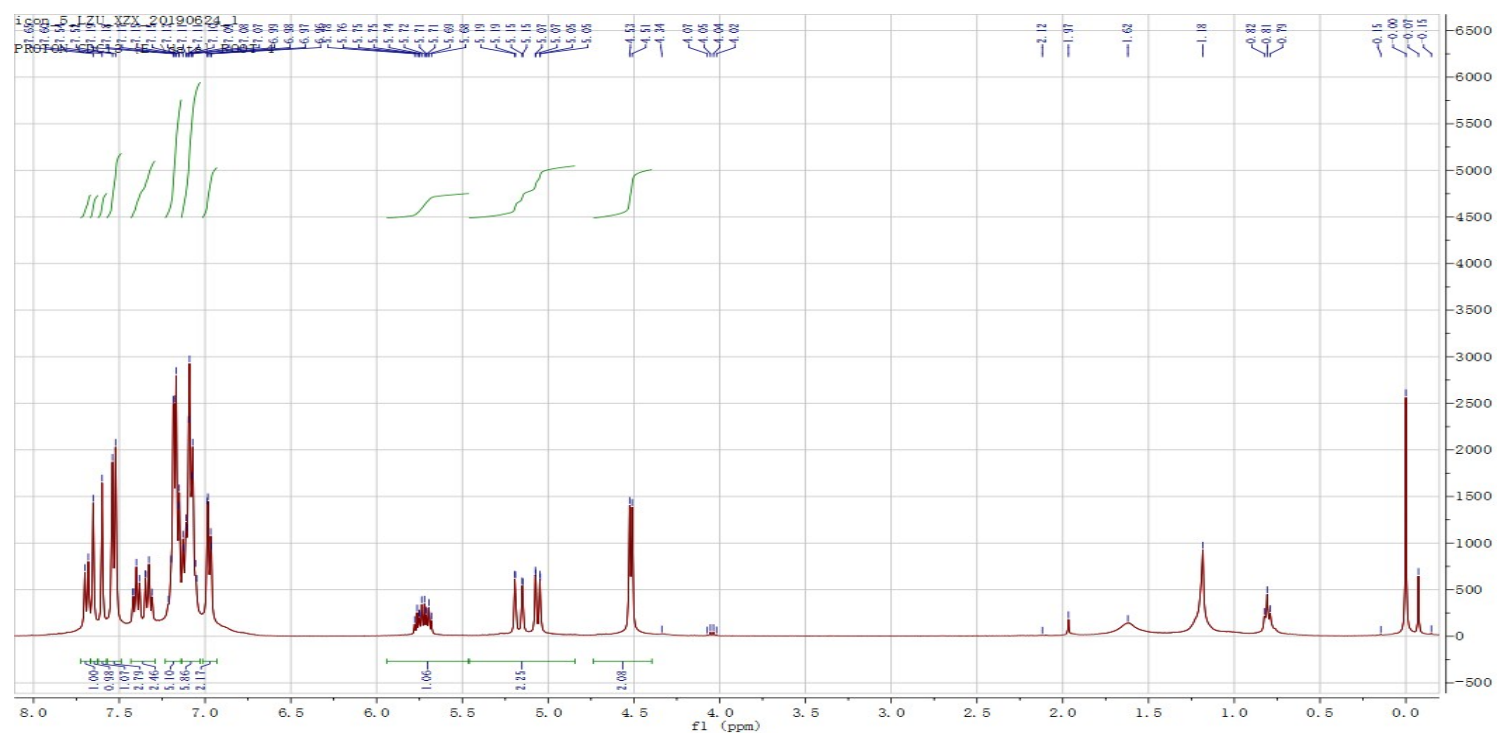

#### $^{13}\text{C}$ NMR spectra of HPNI-1

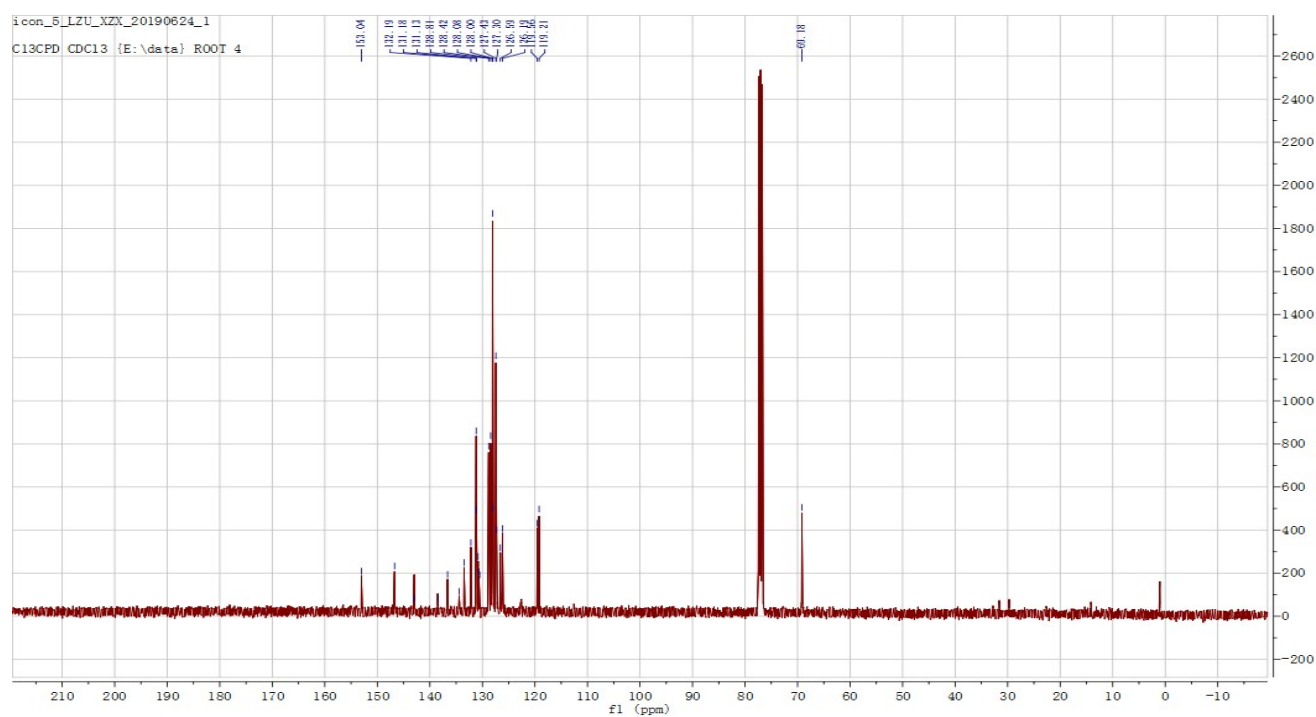

### ESI spectra of HPNI-1

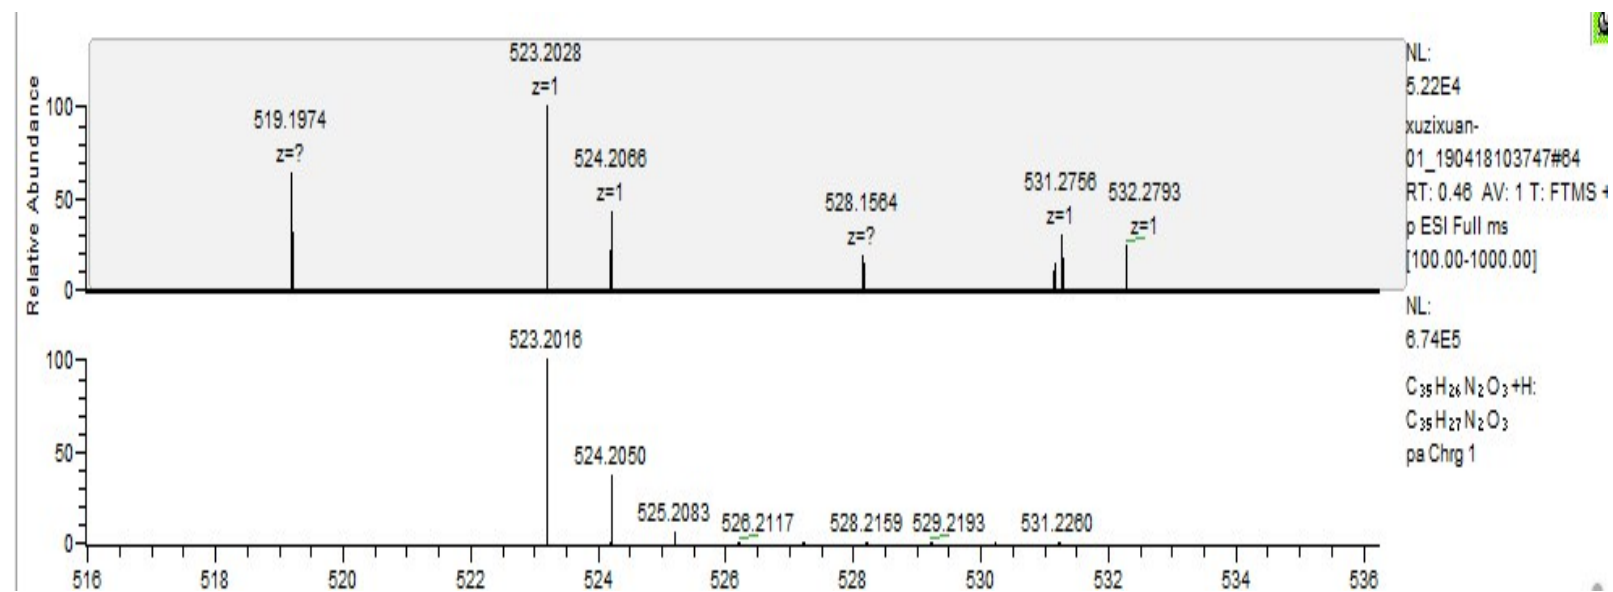

### 3. Additional Spectra

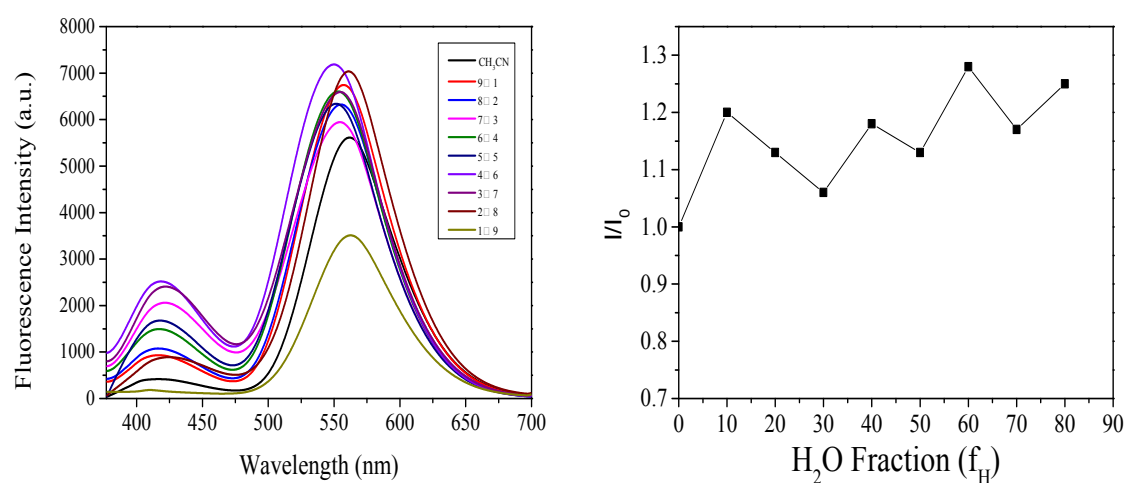

Figure S1. (a) Emission spectra of HPNI in CH<sub>3</sub>CN/H<sub>2</sub>O mixture with different H<sub>2</sub>O fractions (F<sub>H</sub>) (b) the plot of relative emission intensity (I/I<sub>0</sub>) at 560 nm

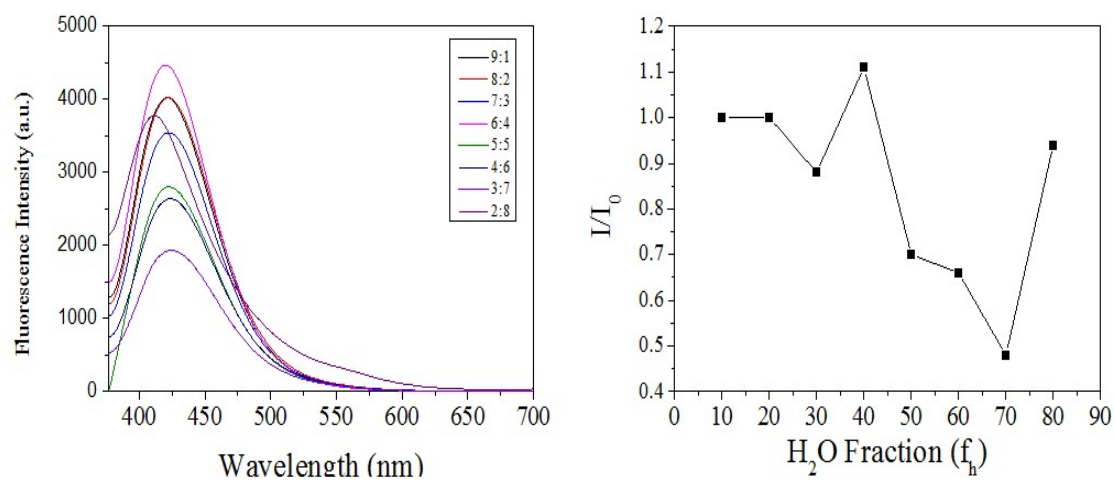

Figure S2. (a) Emission spectra of HPNI-1 in CH<sub>3</sub>CN/H<sub>2</sub>O mixture with different H<sub>2</sub>O fractions (F<sub>H</sub>) (b) the plot of relative emission intensity (I/I<sub>0</sub>) at 420 nm

**Table S1.** Comparison of fluorescent probes for palladium detection

| References                                         | Probe | Detection medium                                  | $\lambda_{ex}/\lambda_{em}$ (nm) | Stokes shift | Detection time | Detection limit |         |     |
|----------------------------------------------------|-------|---------------------------------------------------|----------------------------------|--------------|----------------|-----------------|---------|-----|
| RSC Adv. 2017, 7, 20369-20372                      |       | CH <sub>3</sub> CN-PBS (v/v = 1/1, pH 7.4, 10 mM) | 588/621                          | 33 nm        | 80 min         | 0.78 nM         | Turn on | ICT |
| Chem. Commun. 2010, 46, 3964-3966                  |       | CH <sub>3</sub> CN-PBS (v/v = 1/9, pH 7.4, 10 mM) | 480/520                          | 40 nm        | 180 min        | 30 nM           | Turn on | ICT |
| RSC Adv. 2017, 7, 6583-6586                        |       | EtOH : PBS (9 : 1, v/v, 10 mM)                    | 650/681                          | 31 nm        | 30 min         | 5.7 nM.         | Turn on | ICT |
| J. Photochem. Photobiol. A: Chem. 2017, 337, 25-32 |       | THF/PBS (1:1 v/v, pH = 7.4, 20 mM)                | 500/547                          | 47 nm        | 75 min         | 1.14 nM         | Turn on | ICT |
| Tetrahedron Lett. 2015, 56, 6491-6494              |       | PBS buffer (90% DMSO, v/v, pH 7.4, 20 mM)         | 560/700                          | 140 nm       | 30 min         | 52 nM           | Turn on | ICT |
| Dyes Pigm. 2017, 137, 293-298                      |       | PBS/DMSO (19:1, v/v, pH 7.4, 10 mM)               | 670/721                          | 51 nm        | 30 min         | 22.4 nM         | Turn on | ICT |
| Analyst, 2016, 141, 2376-2379                      |       | 10 mM PBS, pH 7.4                                 | 570/590                          | 20 nm        | 30 min         | 2.1 nM          | Turn on | ICT |
| Sensors and Actuators B 2018, 98-104               |       | PBS buffer (10 mM, pH 7.4, 20% DMSO, v/v)         | 602/665                          | 63 nm        | 2 min          | 2.2 nM          | Turn on | ICT |

|                                         |                                                                                     |                                                                                                              |                                                                                         |        |         |                 |             |             |
|-----------------------------------------|-------------------------------------------------------------------------------------|--------------------------------------------------------------------------------------------------------------|-----------------------------------------------------------------------------------------|--------|---------|-----------------|-------------|-------------|
| Chem. Commun. 2014, 50, 13525–13528     | 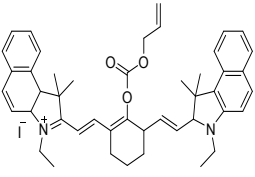   | CH <sub>3</sub> CN–PBS (v/v = 1/3, pH 7.4, 10 mM)                                                            | $\lambda_{\text{ex}} = 545 \text{ nm}$ ,<br>$\lambda_{\text{em}} = 810/655 \text{ nm}$  | 110 nm | 20 min  | 2.8 nM          | ratiometric | ICT         |
| Org. Lett. 2011, 13, 4922–4925          |    | CH <sub>3</sub> CN:H <sub>2</sub> O = 4:1 NaBH <sub>4</sub> -PPh <sub>3</sub> (10 mM) and morpholine (10 mM) | $\lambda_{\text{ex}} = 403 \text{ nm}$ ,<br>$\lambda_{\text{em}} = 462/524 \text{ nm}$  | 121 nm | 5 min   | 6.1 nM          | ratiometric | ICT         |
| RSC Adv. 2015, 5, 52516-52521           |    | DMSO/PBS (1/1, v/v, Ph7.4, 20 mM).                                                                           | $\lambda_{\text{ex}} = 420 \text{ nm}$ ,<br>$\lambda_{\text{em}} = 570/643 \text{ nm}$  | 171 nm | 30 min  | 24.2 nM         | ratiometric | ICT         |
| J. Mater. Chem. B., 2016, 4, 3911-3915. |   | PBS buffer (10 mM, pH 7.4, with 10% CH <sub>3</sub> CN, v/v).                                                | $\lambda_{\text{ex}} = 320 \text{ nm}$ ,<br>$\lambda_{\text{em}} = 388/476 \text{ nm/}$ | 156 nm | 20 min  | 15.6 nM         | ratiometric | ESIPF       |
| Chem. Asian J., 2015, 10, 1142-1145.    |  | PBS buffer (10 mM, pH 7.4)                                                                                   | $\lambda_{\text{ex}} = 320 \text{ nm}$ ,<br>$\lambda_{\text{em}} = 495/635 \text{ nm/}$ | 315 nm | 30 min  | 57 nM           | ratiometric | ESIPF       |
| Chem. Commun., 2012, 48, 2867-2869      |  | CH <sub>3</sub> CN–H <sub>2</sub> O (1:4, v/v)                                                               | $\lambda_{\text{ex}} = 360 \text{ nm}$ ,<br>$\lambda_{\text{em}} = 412/517 \text{ nm/}$ | 157 nm | 180 min | 87 nM           | ratiometric | ESIPF       |
| Anal. Chim. Acta., 2013, 786, 139-145.  |  | PBS buffer, pH = 7.0, 10 mL, 20 mM                                                                           | $\lambda_{\text{em}} = 415/555 \text{ nm}$                                              | --     | 5 min   | 1 $\mu\text{M}$ | ratiometric | ESIPF       |
| Sensors and Actuators B 2018, 554-562   |  | HEPES buffer (10 mM, pH 7.4, with 20% CH <sub>3</sub> CN, v/v).                                              | $\lambda_{\text{ex}} = 511 \text{ nm}$ ,<br>$\lambda_{\text{em}} = 490/547 \text{ nm/}$ | 36 nm  | 10 min  | 31 nM           | ratiometric | ESIPF-FRET. |
| Org. Biomol. Chem., 2017,15, 5846-5850  |  | PBS buffer (pH = 7.4, with 10% THF) NaBH <sub>4</sub>                                                        | $\lambda_{\text{em}} = 470/552 \text{ nm}$                                              | --     | 1.5 min | 9.0 nM          | ratiometric | ESIPF       |
| <b>This work</b>                        |  | CH <sub>3</sub> CN:H <sub>2</sub> O = 3:2 KBH <sub>4</sub> (1 mM)                                            | $\lambda_{\text{ex}} = 340 \text{ nm}$ ,<br>$\lambda_{\text{em}} = 410/570 \text{ nm}$  | 230 nm | 2 min   | 1.34 nM         | ratiometric | ESIPF-AIEE  |
